1 **Interrogating Changes in COVID-19 Vaccine Intent**  
2 **During the National Vaccine Rollout in the Philippines**

3  
4  
5  
6 Alexandria Caple<sup>1</sup>, Arnie Dimaano<sup>2</sup>, Marc Martin Sagolili<sup>2</sup>, April Anne Uy<sup>2</sup>, Panjee Mariel  
7 Aguirre<sup>3</sup>, Dean Alano<sup>2</sup>, Kaila Andrine Baul<sup>2</sup>, Giselle Sophia Camaya<sup>2</sup>, Angelo Raine Carlos<sup>2</sup>,  
8 Brent John Ciriaco<sup>3</sup>, Princess Jerah Mae Clavo<sup>2</sup>, Dominic Cuyugan<sup>2</sup>, Cleinne Florence Geeseler  
9 Fermo<sup>2</sup>, Paul Jeremy Lanete<sup>2</sup>, Ardwayne Jurel La Torre<sup>3</sup>, Thomas Loteyro<sup>3</sup>, Raisa Mikaela Lua<sup>2</sup>,  
10 Nicole Gayle Manansala<sup>2</sup>, Raphael Mosquito<sup>2</sup>, Alexa Marie Octaviano<sup>2</sup>, Alexandra Erika  
11 Orfanel<sup>2</sup>, Anne Elizabeth Papa<sup>2</sup>, Gheyanna Merly Pascual<sup>2</sup>, Mark Nhel Peralta<sup>2</sup>, Aubrey Joy  
12 Sale<sup>2</sup>, Sophia Lorraine Tendenilla<sup>2</sup>, Maria Sofia Lauren Trinidad<sup>2</sup>, Nicole Jan Trinidad<sup>2</sup>, Daphne  
13 Louise Verano<sup>2</sup>, and Nicanor Austriaco<sup>2,4,5\*</sup>

14  
15  
16 <sup>1</sup>Department of Psychology, Providence College, 1 Cunningham Square, Providence, Rhode Island 02918,  
17 U.S.A.

18 <sup>2</sup>Department of Biological Sciences, University of Santo Tomas, España Blvd., Manila 1015, PHILIPPINES

19 <sup>3</sup>Department of Advertising Arts, University of Santo Tomas, España Blvd., Manila 1015, PHILIPPINES

20 <sup>4</sup>Research Center for the Natural and Applied Sciences, University of Santo Tomas, España Blvd., Manila  
21 1015, PHILIPPINES

22 <sup>5</sup>UST Laboratories for Vaccine Science, Molecular Biology, and Biotechnology, University of Santo Tomas,  
23 España Blvd., Manila 1015, PHILIPPINES

24  
25  
26  
27  
28  
29  
30  
31  
32  
33  
34 Corresponding Author: Rev. Nicanor Austriaco, OP, UST Laboratories for Vaccine Science, Molecular  
35 Biology, and Biotechnology, University of Santo Tomas, España Blvd., Manila 1015, PHILIPPINES  
36 Email address: [naustriaco@ust.edu.ph](mailto:naustriaco@ust.edu.ph)

37 **Abstract**

38 To mitigate the unprecedented health, social, and economic damage of COVID-19, the Philippines  
39 implemented a nation-wide vaccine program to mitigate the effects of the global pandemic. In a previous  
40 study, we interrogated COVID-19 vaccine intent in the country by deploying a nationwide open-access  
41 online survey, two months before the initial rollout of the national vaccination program that began in  
42 March of 2021. In this follow-up study, we explored the influence of the ongoing vaccine rollout on  
43 vaccine intent by deploying a similar survey six months after the initial rollout of vaccines had begun  
44 throughout the archipelago. Our data suggests that the presence of vaccines and vaccinated individuals in  
45 a Filipino community predicts vaccination intent. When directly asked if they were more willing to  
46 receive a vaccination than six months prior, 92.26% agreed to some extent that they were indeed more  
47 willing. Finally, despite the changes in the numbers of respondents who were more open to the COVID-  
48 19 vaccines, there were no significant changes in the predictive power of our Health Belief Model (HBM)  
49 constructs. For the most part, the HBM factors that predicted vaccination intent in our earlier study also  
50 predicted vaccination intent in this current study.

## 51 **Introduction**

52 On January 30, 2020, the Department of Health (DOH) of the Philippines reported its first case of  
53 COVID-19, a novel respiratory disease first identified in Wuhan, China, that is caused by the coronavirus,  
54 SARS-CoV-2 (Xie et al., 2020; Zhu et al., 2020; Guan et al., 2020; Reis et al., 2022). With widespread  
55 human-to-human transmission, the virus is highly contagious, and the COVID-19 pandemic became a  
56 global concern of historic proportions (van Ginneken et al., 2022; Siddiqui, Alhamdi & Alghamdi, 2022;  
57 Sachs et al., 2022; Cassell et al., 2022). As of April 5, 2023, there have been 4,082,418 confirmed cases  
58 and 66,390 confirmed deaths from COVID-19 reported by the DOH throughout the archipelago  
59 ([www.covid19.gov.ph](http://www.covid19.gov.ph)).

60 Vaccination has long been regarded as the most effective means for combating infectious  
61 disease (Rappuoli et al., 2014; Sathyanarayana et al., 2020). The Philippines began its national vaccine  
62 drive against COVID-19 on March 1, 2021, with the goal of vaccinating seventy million of its citizens by  
63 the end of the calendar year (Inter-Agency Task Force for the Management of Emerging Infectious  
64 Disease, 2021). One of the ongoing challenges for this campaign is the vaccine hesitancy among the  
65 Filipino people (Alfonso et al., 2021). Though immunization rates had been relatively high in the  
66 Philippines for many decades, the controversial 2016 rollout of the dengue vaccine, Dengvaxia, triggered  
67 significant drops in the rates of immunization as Filipino parents refused to have their children routinely  
68 vaccinated against polio, chicken pox, and tetanus (Fatima & Syed, 2018; Smith, 2018; Reñosa et al.,  
69 2022).

70 The Health Belief Model (HBM) posits that people are likely to adopt disease prevention  
71 behaviors and to accept medical interventions like vaccines if there is sufficient motivation and cues to  
72 action (Rosenstock, Strecher & Becker, 1988; Limbu, Gautam & Pham, 2022a; Limbu & Gautam, 2023).  
73 Motivational factors include perceived susceptibility to and severity of the disease and perceived benefits  
74 of the vaccine. Cues to action include information, people, and events that nudge the individual towards  
75 vaccination. The HBM has been adopted as a conceptual framework that has been used to evaluate the  
76 beliefs and attitudes toward a diversity of vaccines including the influenza, human papillomavirus, and  
77 hepatitis B vaccines (Teitler-Regev, Shahrabani & Benzion, 2011; Donadiki et al., 2014; Hu et al., 2017;  
78 Chen et al., 2019). Moreover, several studies have shown that the HBM constructs can serve as an  
79 important predictor of influenza vaccination uptake (Brewer et al., 2007; Shahrabani, Benzion & Yom  
80 Din, 2009; Shahrabani & Benzion, 2010; Tsutsui, Benzion & Shahrabani, 2012; Alsuwailem et al., 2023).  
81 During the COVID-19 pandemic, the HBM was used to assess the root causes of COVID-19 vaccine  
82 hesitancy in the Asia-Pacific region and beyond (Kabir et al., 2021; Alobaidi, 2021; Huynh et al., 2021;  
83 Zilhada et al., 2022; Jian Ng et al., 2022; Shah et al., 2022; Seangpraw et al., 2022b,a; Limbu, Gautam &

84 Pham, 2022b; Ghazy et al., 2022; Hidayana et al., 2022; Qin et al., 2022; Harutyunyan et al., 2023;  
85 Berger et al., 2023; Toledo-López et al., 2023).

86 In an earlier study, we interrogated COVID-19 vaccine intent in the Philippines by deploying a  
87 nationwide open-access online survey, two months *before* the rollout of the national vaccination program  
88 (Caple et al., 2022). Multivariable analysis of our data revealed then that HBM constructs were associated  
89 with vaccination intent in the Filipino population. In this follow-up study, we explored the influence of an  
90 ongoing vaccine rollout on vaccine intent by deploying a survey six months *after* the initial rollout of  
91 vaccines had begun throughout the Philippines. We wanted to determine if and how a vaccine rollout  
92 would predict public perceptions of the vaccines.

93 Results of the current study suggest that the presence of vaccines and vaccinated individuals in a  
94 Filipino community was associated with an increase in vaccination intent. When directly asked if  
95 individuals were more willing to receive a vaccination than six months prior, 92.26% agreed to some  
96 extent that they were indeed more willing. Finally, despite the changes in the numbers of respondents who  
97 were more open to the COVID-19 vaccines, there were no significant changes in the predictive power of  
98 the HBM constructs. For the most part, HBM factors that predicted vaccination intent in our earlier study  
99 also predicted vaccination intent in this current study.

100

## 101 **Materials & Methods**

### 102 **Participants and Survey Design**

103 The current study design was a cross-sectional, open-access, anonymous, web-based survey—  
104 developed using Qualtrics—conducted from August 14, 2021, to September 13, 2021. Our research team  
105 deployed an anonymous survey link via the social platforms of the University of Santo Tomas (UST) like  
106 Twitter and Facebook and university mailing lists including the UST School of Science and UST Student  
107 Council to distribute the survey. Participants were encouraged to distribute the survey link to their  
108 contacts throughout the country. The questionnaire was written in both Filipino and English. Responses  
109 used for data collection were limited to respondents who were at least 18 years old. An IRB-approved  
110 informed consent statement was included in the survey instrument to welcome respondents who had  
111 clicked on the anonymous survey link.

112

### 113 **Survey Instrument**

114 The survey consisted of questions and statements that assessed the following: (1) demographics,  
115 health status, and COVID-19 experience; (2) openness to a COVID-19 vaccine, and if participants  
116 received a COVID-19 vaccine; (3) perceived susceptibility to and severity of COVID-19; (4) perceived

117 benefits of a COVID-19 vaccine; and (5) barriers of a COVID-19 vaccine, and cues to action to obtain a  
118 COVID-19 vaccine.

119           Demographics, health status, and COVID-19 experience: Demographic information including  
120 age, sex, marital status, education level, occupation, and urban or rural location of residence were  
121 collected. Participants were also asked if they have an existing chronic condition, how they would rate  
122 their overall health, if they ever personally tested positive for COVID-19, to indicate if they know anyone  
123 who has tested positive for COVID-19, and if they know someone who has been vaccinated against  
124 COVID-19.

125           Openness to a COVID-19 vaccine and participant vaccination status: Openness to a COVID-19  
126 vaccine was assessed using two items (“Would you take a COVID-19 vaccine?”, “Are you more willing  
127 to take a COVID-19 vaccine now than you were six months ago?”) on a five-point scale ranging from 1 =  
128 ‘definitely no’ to 5 = ‘definitely yes’. Responses were further recoded into two distinct categories:  
129 vaccine resistance (responses included: ‘definitely no’, ‘probably no’, and ‘unsure’) and vaccine  
130 acceptance (responses included: ‘probably yes’ and ‘definitely yes’) for both scale items. Participant  
131 COVID-19 vaccination status was assessed using a one-item question (“Have you been vaccinated against  
132 COVID-19?”). Responses were additionally recoded into three distinct categories: not vaccinated,  
133 partially vaccinated, and fully vaccinated. Participants who indicated they had received either partial or  
134 full vaccination status were also asked to specify which vaccine they receive (“If you have been  
135 vaccinated against COVID-19, which vaccine did you receive?”).

136           Perceived susceptibility to and severity of COVID-19: Health Belief Model (HBM) derived items  
137 were used to assess individual beliefs about a COVID-19 vaccine as well as individual beliefs about a  
138 COVID-19 vaccine prior to the national vaccine rollout. Questions posted to participants assessed  
139 perceived susceptibility of COVID-19 (three items), and perceived severity of COVID-19 (four items).  
140 All response items were on a four-point scale ranging from ‘strongly disagree’ to ‘strongly agree’. For  
141 analysis purposes, all responses were coded as either *disagree* (responses included: ‘strongly disagree’  
142 and ‘disagree’) or *agree* (responses included: ‘strongly agree’ and ‘agree’).

143           Perceived benefits of a COVID-19 vaccine: Perceived benefits were assessed using seven items,  
144 including statements that examined perceived benefits of a COVID-19 vaccine compared to before the  
145 national vaccine rollout. All response items were rated on a four-point scale ranging from ‘strongly  
146 disagree’ to ‘strongly agree’. Similar to perceived susceptibility to and severity of COVID-19, all  
147 responses were coded as either *disagree* or *agree*.

148           Perceived barriers of a COVID-19 and cues to action: Perceived barriers surrounding a COVID-  
149 19 vaccine (e.g., “I worry about the possible side-effects of the COVID-19 vaccine”; “I worry about fake  
150 COVID-19 vaccines”). For analysis purposes, all responses were coded as either *disagree* or *agree*.

151 Additionally, cues to actions were assessed used eight items. All responses items were on a four-point  
152 scale ranging from ‘strongly disagree’ to ‘strongly agree’. All responses were coded as either *disagree*  
153 (responses included: ‘strongly disagree’ and ‘disagree’) or *agree* (responses included: ‘strongly agree’  
154 and ‘agree’).

155

### 156 **Ethics Review & IRB Approval**

157 Our study protocol (Protocol Number 21-026) was reviewed and approved by the Institutional  
158 Review Board of Providence College on January 15, 2021, with an amendment for the current study being  
159 reviewed and approved on July 15, 2021. Originally, we had sought ethical review at the University of  
160 Santo Tomas in the Philippines for our initial study but were advised by university authorities there to  
161 seek accelerated IRB approval in the United States due to the impact of the then ongoing- COVID-19  
162 pandemic.

163

### 164 **Statistical Analyses**

165 All statistical analyses were conducted using Statistical Package for the Social Sciences (SPSS)  
166 version 28. A *p*-value of less than .05 was considered statistically significant. Frequency tables, charts,  
167 and proportions were used for data summarization—proportions and their respective 95% confidence  
168 intervals (CI) were calculated for each predictor variable. Participant responses to the one-item COVID-  
169 19 vaccine status question (“Have you been vaccinated against COVID-19?”) was coded into two groups:  
170 not vaccinated and partially vaccinated/fully vaccinated responses. We ran univariate analyses followed  
171 by a multinomial logistic regression analysis, including all factors showing significance ( $p < .05$ ), to  
172 determine which factors predicted individual COVID-19 vaccine intention. Only significant factors in the  
173 univariate analyses were included in the multinomial logistic regression analysis.

174

## 175 **Results**

### 176 **Demographics**

177 A total of 5,130 complete survey responses were received. Responses received represented  
178 participants with diverse demographics (Table 1) and from various regions of the Philippines (Figure 1).  
179 Demographic breakdowns were similar to our study of COVID-19 intent three months prior to the  
180 national vaccine rollout (Caple et al., 2022). However, the current study sample had a higher  
181 representation of younger adults aged 18 to 30 years old (67.3%). Additionally, the majority of  
182 participants identified as female (64.2%), single (75.7%), had obtained a college/university degree or  
183 above (77.2%), and lived in an urban area (79.7%). A small portion of our sample reported they have an

184 existing chronic condition (12.4%), while 11.9% of respondents reported having ‘fair’ health.  
185 Additionally, 64.3% of the sample reported knowing someone who has tested positive for COVID-19.

186

### 187 **Health Beliefs**

188 As displayed in Table 2, with regards to perceived susceptibility to COVID-19 vaccines, a portion  
189 of respondents (42.8%) agreed to some extent (which includes *strongly agreed/agreed*) there was a high  
190 chance of personally contracting COVID-19 in the next few months, which was not significantly different  
191 from the 31.5% reported previously (Caple et al., 2022). A significant majority of respondents (81.1%)  
192 also agreed to some extent that they were worried about the likelihood of personally contracting COVID-  
193 19. This was comparable to the number (84.1%) reported nine months earlier (Caple et al., 2022).  
194 Similarly, a large majority of respondents reported agreement to some extent when asked about their  
195 personal worry about the likelihood of someone in their family contracting COVID-19 (86.6%). A  
196 majority of participants reported COVID-19 is a serious disease with life-threatening complications  
197 (95.91%). A notable majority of respondents (92.7%) agreed to some extent that they were personally  
198 afraid of contracting COVID-19 and that they would personally be very sick if they contracted COVID-  
199 19 (72.1%). These were indistinguishable from the numbers, 93.1% and 75%, that reported previously  
200 from our survey completed nine months prior to this study (Caple et al., 2022).

201 With regards to the perceived benefits of vaccination, a majority of participants reported  
202 vaccination would decrease their chances of personally contracting COVID-19 (87.35%) as well as their  
203 worries about contracting COVID-19 (87.78%). While a majority of respondents reported they had  
204 worries about possible side-effects (68.1%), effectiveness (68.3%), safety (63.7%), and high cost (63.1%)  
205 of a COVID-19 vaccine, these numbers are overall lower compared to previous findings (Caple et al.,  
206 2022). Additionally, a majority of participants reported being worried about fake COVID-19 vaccines  
207 (88.5%).

208 Next, we assessed possible cues to action for COVID-19 vaccination in the course of a national  
209 vaccination campaign (Table 2). Our results suggest respondents’ motivation to be immunized was  
210 predicted by whether they would be rewarded with perks offered by the private sector including discounts  
211 at restaurants and other service industries (80.0% agreed to some extent that they were motivated by this  
212 incentive), and rewarded with more freedom to move around and meet other people (78.8% agreed to  
213 some extent that they were motivated by this incentive). They were less enthusiastic about rewards that  
214 gave them freedom to remove masks in the company of fellow vaccinated individuals (58.69% *strongly*  
215 *agree/agree* that they were motivated by this incentive). Respondents also revealed that hearing from  
216 fully vaccinated people (87.5% agreed to some extent) and seeing family members and friends get

217 vaccinated (87.5% agreed to some extent) were predictive factors that would encourage one to seek  
218 vaccination.

219 Finally, as shown in Table 3, respondents were also prompted with statements about COVID-19  
220 perceptions compared to six months prior. A majority of participants agreed to some extent (73%) that  
221 their chance of personally contracting COVID-19 was lower compared to six months prior. Similarly,  
222 67.2% of participants agreed to some extent that they were less worried about the likelihood of  
223 contracting COVID-19. A majority (63.2%) also revealed that were also less worried about the likelihood  
224 of someone in their family contracting COVID-19 compared to six months prior.

225 With regards to perceived barriers to vaccination, majorities of respondents revealed that they  
226 were less worried about the possible side-effects of the vaccines (78.8%), less worried about vaccine  
227 effectiveness (76.7%), less worried about vaccine safety (78.64%), less worried about fake vaccines  
228 (64.4%), and less worried about vaccine testing (70.57%) compared to six months prior. Overall, our  
229 respondents were less worried about every aspect of possible concern associated with COVID-19  
230 vaccination.

231

### 232 **COVID-19 Vaccination Intent**

233 Survey participants were asked whether they had been vaccinated against COVID-19, which was  
234 recoded into three groups: not vaccinated (16.7%), partially vaccinated (28.8%), or fully vaccinated  
235 (54.5%) (Figure 2A). We also included a specific question to interrogate vaccination intent. As shown in  
236 Figure 2B, when responses to the question, “Would you take a COVID-19 vaccine?”, were recoded into  
237 two groups, a majority of respondents (95.3%) indicated vaccine acceptance (responses included  
238 ‘probably yes’ and ‘definitely yes’). Only 242 of the 5,130 respondents (4.7%) were vaccine resistant  
239 (responses included were ‘definitely no’, ‘probably no’, and ‘unsure’). A similar pattern emerged when  
240 participants were asked if they were more willing to take a COVID-19 vaccine now as compared to six  
241 months prior, with a vast majority (92.3%) identifying as open (responses included ‘definitely yes’ or  
242 ‘probably yes’) to the COVID-19 vaccines (Table 3).

243 Table 4 shows the univariate and multinomial analyses of factors associated with vaccination  
244 status by demographics and HBM constructs. Univariate analyses were conducted examining vaccine  
245 resistance and vaccine acceptance as a binary—not vaccinated and partially/fully vaccinated respectively.  
246 A total of 4,274 of respondents (83.3%) reported they were either partially ( $n = 1476$ , 28.8%) or fully  
247 vaccinated ( $n = 2798$ , 54.5%); demonstrating they were vaccine acceptant—while 856 of respondents  
248 (16.7%) reported they were not vaccinated suggesting that they were vaccine resistant. The majority of  
249 respondents who identified as being in the 18-30 age range, also reported being either partially or fully  
250 vaccinated ( $n = 2752$ , 79.7%).



251 Univariate analyses showed a high proportion of participants who identified as married (90.8%)  
252 noted they were either partially or fully vaccinated than compared to 80.9% of partially or fully  
253 vaccinated, single respondents. This association, however, was not significant in the multinomial analysis.  
254 When examining participant occupation, a higher proportion of respondents that identified as having  
255 vaccine acceptance (i.e., either partially or fully vaccinated) also identified as professional/white collar  
256 workers (91.2%). Additionally, significant differences were noted in vaccination status by geographic  
257 location, where individuals in urban locations (85.3%) reported being either partially or fully vaccinated,  
258 while 75.4% of participants in rural locations noted they were either partially or fully vaccination.

259 Based on demographics, univariate analyses revealed that females have greater odds of being  
260 either partially or fully vaccinated (OR = .653, 95% CI [.556, .768]) than males—a finding that also was  
261 statistically significant in the multinomial analysis. Furthermore, being a blue collar worker (OR = 1.918,  
262 95% CI [1.294, 2.843]), a professional or white collar worker (OR = 1.694, 95% CI [1.195, 2.400]), a  
263 student (OR = .320, 95% CI [.233, .439]), having an existing chronic condition (OR = 1.425, 95% CI  
264 [1.115, 1.822]), and perceived overall health reported as ‘fair’, ‘poor’, or ‘very poor’ (OR = .494, 95% CI  
265 [.395, .617]) and as ‘good’ (OR = .712, 95% CI [.604, .840]), were significant predictors of vaccination  
266 status.

267 Most of the HBM factors were significantly associated with vaccination status. We observed a  
268 similar pattern in our previous study (Caple et al., 2022). While 50.4% of respondents noted they were  
269 worried COVID-19 vaccines would make them sick, disagreement with that notion (OR = 2.683, 95% CI  
270 [2.028, 3.551]) was the strongest predictor of vaccination status when comparing not vaccinated  
271 participants to fully vaccinated participants. Individual disagreement with the belief that COVID-19  
272 vaccination would decrease participant worries about personally contracting COVID-19 for not  
273 vaccinated compared to partially vaccinated respondents (OR = 2.066, 95% CI [1.391, 3.068]) and for not  
274 vaccinated compared to fully vaccinated respondents (OR = 1.819, 95% CI [1.246, 2.654]) was also a  
275 strong predictor of vaccination status.

276 Finally, in Table 5, we compared the HBM constructs that were associated with vaccination intent  
277 in our earlier study (Caple et al., 2022), with the same constructs in this study, to determine if they had  
278 changed. Our analysis revealed that beliefs around the perceived susceptibility to getting COVID-19--  
279 whether the respondent believed that he or she would become sick in the next six months--which were  
280 predictive of vaccination intent in our earlier study, were now not able to forecast a respondent's openness  
281 to the vaccines. Strikingly, two more belief constructs regarding the perceived barriers of expensive  
282 vaccines and of fake vaccines, also ceased being predictive in this study when they were predictive in our  
283 earlier report.

284

## 285 Discussion

286 How does an ongoing vaccination campaign influence vaccination intent, especially during a  
287 pandemic? How do the presence of vaccines and vaccinated individuals shape and alter, if at all,  
288 vaccination intent? In our previous study, completed two months *before* the rollout of the national  
289 COVID-19 vaccination campaign in the Philippines, we showed that Health Belief Model (HBM)  
290 constructs were significantly associated with vaccination intent in the archipelago (Caple et al., 2022).  
291 Perceptions of high susceptibility, high severity, and significant benefits were all good predictors for  
292 vaccination intent. We also found that external cues to action were important.

293 Here, in a follow-up study completed six months *after* the beginning of the national vaccination  
294 campaign, we discovered that the presence of vaccines and vaccinated individuals in a Filipino  
295 community predicted vaccine intent. Most significantly, in our earlier study, 62.5% of our respondents  
296 indicated that they were willing to be vaccinated when the vaccines became available (Caple et al., 2022).  
297 This study revealed that at the time of our survey, 83.3% of our respondents had already begun the  
298 vaccination series (Figure 2). Strikingly, even more individuals (95.3%) indicated that they were willing  
299 to be vaccinated. When directly asked if they were more willing to receive a vaccination than six months  
300 prior, 92.3% agreed to some extent that they were indeed more willing. This significant increase in  
301 vaccination intent during a comparable time period has also been observed by others in the Philippines  
302 (Macaraan, 2021).

303 How do we explain the difference in numbers between those persons who were vaccinated  
304 (83.3%) and those who said that they were willing to be vaccinated (95.3%)? There are at least two  
305 possibilities. First, there could have been a group of individuals who were still waiting for vaccine access:  
306 These Filipinos were willing to be vaccinated, but there were no vaccines for them at the time of the  
307 survey. This scenario is likely because a significant minority (20.33%) of our respondents lived in rural  
308 areas. At the time of our survey, six months into the national vaccination campaign, the Philippines was  
309 still prioritizing individuals in the urban areas of the country in a bid to build a wall of immunization  
310 around cities that would prevent the transmission of the SARS-CoV2 virus into the rural countryside.  
311 This public policy was named the NCR+8 vaccination strategy (Casinas, 2021; Almajose et al., 2021).

312 Second, there could have been a group of individuals who were waiting to be vaccinated,  
313 allowing others to be vaccinated ahead of them, because of the shortage of vaccines. Though there were  
314 anecdotal stories of altruistic persons circulating on social media during the earliest months of the  
315 national vaccination campaign in the Philippines, they have never been confirmed.

316 Most notably, our study reveals that the presence of vaccines and vaccinated individuals in a  
317 Filipino community predicts vaccination intent (Figure 2). Note that it cannot simply be the presence of  
318 vaccines or vaccinated individuals that predicted vaccination intent, because the global vaccination

319 campaign had already begun at the time of our first study, unleashing numerous posts and reports on  
320 Filipino social media platforms of vaccinated citizens in the Global North. As our study revealed, what is  
321 significant for predicting vaccination intent is not whether or not the respondents knew that others were  
322 getting vaccinated. Rather what was most important is that our respondents personally knew loved ones  
323 and friends who had been vaccinated (Table 2). These were the most significant cues of action to COVID-  
324 19 vaccination in our study. Similarly, a COVID-19 study in Taiwan has also reported the effect of  
325 positive word-of-mouth testimony on vaccination intent (Wu & Chiang, 2023).

326         What is the significance of this finding? It suggests that Filipinos want to hear and to trust the  
327 testimonies of their *kababayans* (“fellow Filipinos, townmates, or countrymen”). Thus, future vaccination  
328 campaigns in the Philippines should showcase Filipinos who have been vaccinated, especially those who  
329 live in the same *barangay* as the target vaccination population. A *barangay* is the smallest administrative  
330 division in the Philippines and is the native Filipino term for a village, a district, or ward. The more  
331 familiar the testimony of the vaccinated *kababayan*, the better.

332         As for additional cues to action for COVID-19 vaccination, our study revealed that our Filipino  
333 respondents believed that concrete rewards for immunization like the private sector's *bakuna* benefits  
334 program which gave immunized individuals exclusive perks, discounts, and even freebies, would  
335 motivate them to get immunized. These *bakuna* benefits included free menu items, free upgrades on drink  
336 sizes, and “buy one, get one” promotional items (Ignacio, 2021). Other vaccination perks including more  
337 freedom to mingle with others also motivated our respondents (78.8% agreed to some extent that this  
338 would encourage them) though incentives that would give them more freedom to remove masks would  
339 not motivate them as much (58.69% agreed to some extent that this would encourage them). Why not  
340 masks? Surveys have shown that Filipinos value masking and that significant numbers of them intended  
341 to continue wearing their masks even years after the official end of the pandemic (De Vera-Ruiz, 2022).

342         Next, despite the changes in the numbers of respondents who became more open to the COVID-  
343 19 vaccines after the rollout of the national vaccination campaign, there were no significant changes in  
344 the predictive power of the HBM constructs during the same time period. For the most part, HBM factors  
345 that predicted vaccination intent in our earlier study also predicted vaccination intent in this current study  
346 (Table 5). Only one, age of the respondent, became predictive when it was not so in our previous work.  
347 One simple explanation for this is that the vaccination rollout in the Philippines prioritized the elderly. As  
348 such, at the time of our survey, it was significantly more likely for a senior citizen to be vaccinated than  
349 for a young adult to have been immunized (Rappler.com, 2021). This was not the case prior to the arrival  
350 of the vaccines.

351         Four of the twenty-four HBM constructs assessed in the current study no longer predicted vaccine  
352 intent once the national vaccination strategy was underway (Table 5). Two involved a respondent's

353 perceived susceptibility to COVID-19, and two were related to one's worries regarding the cost and the  
354 authenticity of the COVID-19 vaccines. In our earlier study, respondents who believed that there was a  
355 high risk that they would get infected with SARS-CoV2 were more likely to be open to the COVID-19  
356 vaccines (Caple et al., 2022). In this study, perceived susceptibility ceased to be associated with a positive  
357 vaccine intent. One possible explanation is that a large number of our respondents in this study (67.2%)  
358 also reported that they had simply become less worried about COVID-19. These results suggest that fear  
359 of severe illness simply became less of a concern among our respondents as the vaccines were rolled out.

360 Similarly, worries surrounding the cost and authenticity of the COVID-19 vaccines lost their  
361 ability to predict vaccination intent. This should not be surprising since the availability of free and  
362 legitimate vaccines in the Philippines would have made these concerns moot in the minds of many  
363 Filipinos. Of note, the national government launched a widespread public advisory campaign against fake  
364 COVID-19 vaccines throughout the rollout of the national vaccination campaign. It was quick to  
365 announce investigations of companies purporting to distribute fake vaccines (CNN, 2021).

366 Finally, our study has several limitations. As we already noted with our earlier study, the use of  
367 an open-access online survey may result in sampling bias so we cannot generalize our findings to the  
368 entire Filipino population (Wyatt, 2000; Eysenbach & Wyatt, 2002). Furthermore, the responses were  
369 based on self-report and may be subject to self-reporting bias and a tendency to report socially desirable  
370 responses especially in a strongly collectivist society like the Philippines. Despite these shortcomings, we  
371 believe that our findings will provide insights to support future vaccine rollouts in the Philippines by  
372 helping public health authorities to understand vaccine demand and vaccine hesitancy in the country.

373 **References**

- 374 Alfonso C., Dayrit M., Mendoza R., Ong M. 2021. From Dengvaxia to Sinovac: Vaccine Hesitancy in the  
375 Philippines. *The Diplomat*.
- 376 Almajose APL., White A., Diego MCE., Lazaro R., Nicanor Austriaco OP. 2021. 2SIR-VD Model to  
377 Compare Idealized COVID-19 Vaccine Distribution Strategies in the Philippines. *Philippine*  
378 *Journal of Science* 150:1765–1778. DOI: 10.56899/150.6B.13.
- 379 Alobaidi S. 2021. Predictors of Intent to Receive the COVID-19 Vaccination Among the Population in  
380 the Kingdom of Saudi Arabia: A Survey Study. *Journal of multidisciplinary healthcare* 14:1119–  
381 1128. DOI: 10.2147/JMDH.S306654.
- 382 Alsuwailem SI., Okmi EA., Alkhaldi EH., Almutairi KS., Alshamari WK. 2023. Determinants of Flu  
383 Vaccine Uptake Among the General Population in Saudi Arabia: A Study Based on the Health  
384 Belief Model. *Cureus* 15:e41277. DOI: 10.7759/cureus.41277.
- 385 Berger C., Ben-Shalom U., Tarant Z., Longo J., DeDonno M. 2023. The Influence of the Health Belief  
386 Model on the Decision to Get the COVID-19 Vaccine: An International Survey Study of College  
387 Students. *Inquiry : a journal of medical care organization, provision and financing*  
388 60:469580231164229. DOI: 10.1177/00469580231164229.
- 389 Brewer NT., Chapman GB., Gibbons FX., Gerrard M., McCaul KD., Weinstein ND. 2007. Meta-analysis  
390 of the relationship between risk perception and health behavior: The example of vaccination. *Health*  
391 *Psychology* 26:136–145. DOI: 10.1037/0278-6133.26.2.136.
- 392 Caple A., Dimaano A., Sagolili MM., Uy AA., Aguirre PM., Alano DL., Camaya GS., Ciriaco BJ., Clavo  
393 PJM., Cuyugan D., Fermo CFG., Lanete PJ., La Torre AJ., Loteyro T., Lua RM., Manansala NG.,  
394 Mosquito RW., Octaviano A., Orfanel AE., Pascual GM., Sale AJ., Tendenilla SL., Trinidad MSL.,  
395 Trinidad NJ., Verano DL., Austriaco N. 2022. Interrogating COVID-19 vaccine intent in the  
396 Philippines with a nationwide open-access online survey. *PeerJ* 10:e12887. DOI:  
397 10.7717/PEERJ.12887.
- 398 Casinas JA. 2021.12 million workers from “NCR+8” prioritized in A4 COVID-19 vaccination - DOH.  
399 Available at [https://mb.com.ph/2021/06/07/12-million-workers-from-ncr8-prioritized-in-a4-covid-](https://mb.com.ph/2021/06/07/12-million-workers-from-ncr8-prioritized-in-a4-covid-19-vaccination-doh/)  
400 [19-vaccination-doh/](https://mb.com.ph/2021/06/07/12-million-workers-from-ncr8-prioritized-in-a4-covid-19-vaccination-doh/) (accessed October 15, 2023).
- 401 Cassell CH., Raghunathan PL., Henao O., Pappas-DeLuca KA., Rémy WL., Dokubo EK., Merrill RD.,  
402 Marston BJ. 2022. Global Responses to the COVID-19 Pandemic. *Emerging Infectious Diseases*  
403 28:S4–S7. DOI: 10.3201/EID2813.221733.
- 404 Chen IH., Hsu SM., Wu JSJ., Wang YT., Lin YK., Chung MH., Huang PH., Miao NF. 2019.  
405 Determinants of nurses’ willingness to receive vaccines: Application of the health belief model.  
406 *Journal of Clinical Nursing* 28:3430–3440. DOI: 10.1111/jocn.14934.

407 CNN. 2021. PH gov't investigating companies behind spread of fake vaccines. Available at  
408 <https://www.cnnphilippines.com/news/2021/3/30/Fake-vaccines-Philippines.html> (accessed October  
409 15, 2023).

410 Donadiki EM., Jiménez-García R., Hernández-Barrera V., Sourtzi P., Carrasco-Garrido P., López de  
411 Andrés A., Jimenez-Trujillo I., Velonakis EG. 2014. Health Belief Model applied to non-  
412 compliance with HPV vaccine among female university students. *Public Health* 128:268–273. DOI:  
413 10.1016/j.puhe.2013.12.004.

414 Eysenbach G., Wyatt J. 2002. Using the Internet for surveys and health research. *Journal of Medical*  
415 *Internet Research* 4:76–94. DOI: 10.2196/JMIR.4.2.E13.

416 Fatima K., Syed NI. 2018. Dengvaxia controversy: impact on vaccine hesitancy. *Journal of Global*  
417 *Health* 8. DOI: 10.7189/JOGH.08-020312.

418 Ghazy RM., Abdou MS., Awaity S., Sallam M., Elbarazi I., Youssef N., Fiidow OA., Mehdad S.,  
419 Hussein MF., Adam MF., Abdullah FSA., Rebai WK., Raad EB., Hussein M., Shehata SF., Ismail  
420 II., Salam AA., Samhoury D. 2022. Acceptance of COVID-19 Vaccine Booster Doses Using the  
421 Health Belief Model: A Cross-Sectional Study in Low-Middle- and High-Income Countries of the  
422 East Mediterranean Region. *International Journal of Environmental Research and Public Health* 19.  
423 DOI: 10.3390/IJERPH191912136.

424 van Ginneken E., Webb E., Maresso A., Cylus J. 2022. Lessons learned from the COVID-19 pandemic.  
425 *Health Policy* 126:348–354. DOI: 10.1016/j.healthpol.2022.04.004.

426 Guan WJ., Ni ZY., Hu Y., Liang WH., Ou CQ., He JX., Liu L., Shan H., Lei CL., Hui DSC., Du B., Li  
427 LJ., Zeng G., Yuen KY., Chen RC., Tang CL., Wang T., Chen PY., Xiang J., Li SY., Wang JL.,  
428 Liang ZJ., Peng YX., Wei L., Liu Y., Hu YH., Peng P., Wang JM., Liu JY., Chen Z., Li G., Zheng  
429 ZJ., Qiu SQ., Luo J., Ye CJ., Zhu SY., Zhong NS. 2020. Clinical Characteristics of Coronavirus  
430 Disease 2019 in China. *The New England journal of medicine* 382:1708–1720. DOI:  
431 10.1056/NEJMoa2002032.

432 Harutyunyan T., Sargsyan Z., Sahakyan S., Chiloyan A., Melkom Melkomian D., Khachadourian V.  
433 2023. Predicting COVID-19 vaccination uptake in Armenia using the Health Belief Model: Results  
434 from a nationwide survey. *Human Vaccines and Immunotherapeutics* 19. DOI:  
435 10.1080/21645515.2023.2165383.

436 Hidayana I., Amir S., Pelupessy DC., Rahvenia Z. 2022. Using a health belief model to assess COVID-19  
437 vaccine intention and hesitancy in Jakarta, Indonesia. *PLOS global public health* 2:e0000934. DOI:  
438 10.1371/journal.pgph.0000934.

439 Hu Y., Wang Y., Liang H., Chen Y. 2017. Seasonal influenza vaccine acceptance among pregnant  
440 women in zhejiang province, china: Evidence based on health belief model. *International Journal of*

441 *Environmental Research and Public Health* 14. DOI: 10.3390/ijerph14121551.

442 Huynh G., Nguyen T Van., Nguyen DD., Lam QM., Pham TN., Nguyen HTN. 2021. Knowledge About  
443 COVID-19, Beliefs and Vaccination Acceptance Against COVID-19 Among High-Risk People in  
444 Ho Chi Minh City, Vietnam. *Infection and drug resistance* 14:1773–1780. DOI:  
445 10.2147/IDR.S308446.

446 Ignacio R. 2021. “Bakuna” benefits: Perks for COVID-19-vaccinated foodies. Available at  
447 [https://www.philstar.com/lifestyle/food-and-leisure/2021/07/02/2109767/bakuna-benefits-perks-](https://www.philstar.com/lifestyle/food-and-leisure/2021/07/02/2109767/bakuna-benefits-perks-covid-19-vaccinatedfoodies)  
448 [covid-19-vaccinatedfoodies](https://www.philstar.com/lifestyle/food-and-leisure/2021/07/02/2109767/bakuna-benefits-perks-covid-19-vaccinatedfoodies) (accessed October 15, 2023).

449 Inter-Agency Task Force for the Management of Emerging Infectious Disease. 2021. *The Philippine*  
450 *National COVID-19 Vaccination Deployment Plan* | Department of Health website.

451 Jian Ng JW., Vaithilingam S., Nair M., Hwang LA., Musa KI. 2022. Key predictors of COVID-19  
452 vaccine hesitancy in Malaysia: An integrated framework. *PLoS ONE* 17. DOI:  
453 10.1371/journal.pone.0268926.

454 Kabir R., Mahmud I., Chowdhury MTH., Vinnakota D., Jahan SS., Siddika N., Isha SN., Nath SK.,  
455 Hoque Apu E. 2021. COVID-19 Vaccination Intent and Willingness to Pay in Bangladesh: A Cross-  
456 Sectional Study. *Vaccines* 9. DOI: 10.3390/vaccines9050416.

457 Limbu YB., Gautam RK. 2023. How Well the Constructs of Health Belief Model Predict Vaccination  
458 Intention: A Systematic Review on COVID-19 Primary Series and Booster Vaccines. *Vaccines* 11.  
459 DOI: 10.3390/VACCINES11040816.

460 Limbu YB., Gautam RK., Pham L. 2022a. The Health Belief Model Applied to COVID-19 Vaccine  
461 Hesitancy: A Systematic Review. *Vaccines* 10. DOI: 10.3390/VACCINES10060973.

462 Limbu YB., Gautam RK., Pham L. 2022b. The Health Belief Model Applied to COVID-19 Vaccine  
463 Hesitancy: A Systematic Review. *Vaccines* 10. DOI: 10.3390/vaccines10060973.

464 Macaraan WER. 2021. From hesitancy to confidence: Filipinos’ shifting attitude toward COVID-19  
465 vaccination program. *Journal of public health (Oxford, England)*. DOI: 10.1093/pubmed/fdab233.

466 Qin C., Yan W., Du M., Liu Q., Tao L., Liu M., Liu J. 2022. Acceptance of the COVID-19 vaccine  
467 booster dose and associated factors among the elderly in China based on the health belief model  
468 (HBM): A national cross-sectional study. *Frontiers in Public Health* 10. DOI:  
469 10.3389/fpubh.2022.986916.

470 Rappler.com. 2021. FAST FACTS: Prioritized groups, guidelines for COVID-19 vaccination. Available at  
471 [https://www.rappler.com/newsbreak/iq/things-to-know-prioritized-groups-guidelines-covid-19-](https://www.rappler.com/newsbreak/iq/things-to-know-prioritized-groups-guidelines-covid-19-vaccination-philippines/)  
472 [vaccination-philippines/](https://www.rappler.com/newsbreak/iq/things-to-know-prioritized-groups-guidelines-covid-19-vaccination-philippines/)

473 Rappuoli R., Pizza M., Del Giudice G., De Gregorio E. 2014. Vaccines, new opportunities for a new  
474 society. *Proceedings of the National Academy of Sciences of the United States of America*

475 111:12288–12293. DOI: 10.1073/pnas.1402981111.

476 Reis J., Faou A Le., Buguet A., Sandner G., Spencer P. 2022. Covid-19: Early Cases and Disease Spread.  
477 *Annals of Global Health* 88. DOI: 10.5334/aogh.3776.

478 Reñosa MDC., Wachinger J., Bärnighausen K., Endoma V., Landicho-Guevarra J., Landicho J., Bravo  
479 TA., Aligato M., McMahon SA. 2022. Misinformation, infighting, backlash, and an ‘endless’  
480 recovery; policymakers recount challenges and mitigating measures after a vaccine scare in the  
481 Philippines. *Global Health Action* 15. DOI: 10.1080/16549716.2022.2077536.

482 Rosenstock IM., Strecher VJ., Becker MH. 1988. Social Learning Theory and the Health Belief Model.  
483 *Health Education & Behavior* 15:175–183. DOI: 10.1177/109019818801500203.

484 Sachs JD., Karim SSA., Akin L., Allen J., Brosbøl K., Colombo F., Barron GC., Espinosa MF., Gaspar  
485 V., Gaviria A., Haines A., Hotez PJ., Koundouri P., Bascuñán FL., Lee JK., Pate MA., Ramos G.,  
486 Reddy KS., Serageldin I., Thwaites J., Vike-Freiberga V., Wang C., Were MK., Xue L., Bahadur C.,  
487 Bottazzi ME., Bullen C., Laryea-Adjei G., Amor Y Ben., Karadag O., Lafortune G., Torres E.,  
488 Barredo L., Bartels JGE., Joshi N., Hellard M., Huynh UK., Khandelwal S., Lazarus J V., Michie S.  
489 2022. The Lancet Commission on lessons for the future from the COVID-19 pandemic. *The Lancet*  
490 400:1224–1280. DOI: 10.1016/S0140-6736(22)01585-9.

491 Sathyanarayana SD., Fernandes SD., Castelino LJ., Vadakkepushpakath AN., Shriram RG. 2020.  
492 Vaccines in the United States: a systematic review on history of evolution, regulations, licensing,  
493 and future challenges. *Clinical and experimental vaccine research* 9:69–75. DOI:  
494 10.7774/cevr.2020.9.2.69.

495 Seangpraw K., Pothisa T., Boonyathee S., Ong-Artborirak P., Tonchoy P., Kantow S., Auttama N.,  
496 Choowanthanapakorn M. 2022a. Using the Health Belief Model to Predict Vaccination Intention  
497 Among COVID-19 Unvaccinated People in Thai Communities. *Frontiers in Medicine* 9. DOI:  
498 10.3389/FMED.2022.890503.

499 Seangpraw K., Pothisa T., Boonyathee S., Ong-Artborirak P., Tonchoy P., Kantow S., Auttama N.,  
500 Choowanthanapakorn M. 2022b. Using the Health Belief Model to Predict Vaccination Intention  
501 Among COVID-19 Unvaccinated People in Thai Communities. *Frontiers in medicine* 9:890503.  
502 DOI: 10.3389/fmed.2022.890503.

503 Shah S., Gui H., Chua PEY., Tan JY (Benjamin)., Suen LK ping., Chan SW chi., Pang J. 2022. Factors  
504 associated with COVID-19 vaccination intent in Singapore, Australia and Hong Kong. *Vaccine*  
505 40:2949–2959. DOI: 10.1016/J.VACCINE.2022.03.062.

506 Shahrabani S., Benzion U. 2010. Workplace vaccination and other factors impacting influenza  
507 vaccination decision among employees in Israel. *International Journal of Environmental Research*  
508 *and Public Health* 7:853–869. DOI: 10.3390/ijerph7030853.



509 Shahrabani S., Benzion U., Yom Din G. 2009. Factors affecting nurses' decision to get the flu vaccine.  
510 *European Journal of Health Economics* 10:227–231. DOI: 10.1007/s10198-008-0124-3.

511 Siddiqui S., Alhamdi HWS., Alghamdi HA. 2022. Recent Chronology of COVID-19 Pandemic. *Frontiers*  
512 *in Public Health* 10. DOI: 10.3389/fpubh.2022.778037.

513 Smith N. 2018. Philippines immunisation rates plummet amid Dengue vaccination scare. *The Telegraph*.  
514 Teitler-Regev S., Shahrabani S., Benzion U. 2011. Factors Affecting Intention among Students to Be  
515 Vaccinated against A/H1N1 Influenza: A Health Belief Model Approach. *Advances in Preventive*  
516 *Medicine* 2011:1–8. DOI: 10.4061/2011/353207.

517 Toledo-López A., Leyva-Hernández SN., Jiménez-Castañeda JC., Avendaño-Rito MDC. 2023.  
518 Determinants for COVID-19 vaccination intention in Mexico. *Heliyon* 9:e18079. DOI:  
519 10.1016/j.heliyon.2023.e18079.

520 Tsutsui Y., Benzion U., Shahrabani S. 2012. Economic and behavioral factors in an individual's decision  
521 to take the influenza vaccination in Japan. *Journal of Socio-Economics* 41:594–602. DOI:  
522 10.1016/j.socec.2012.05.001.

523 De Vera-Ruiz E. 2022. Most Filipinos still prefer to wear face masks to fight off Covid-19 — OCTA  
524 survey. Available at [https://mb.com.ph/2022/09/13/most-filipinos-still-prefer-to-wear-face-masks-](https://mb.com.ph/2022/09/13/most-filipinos-still-prefer-to-wear-face-masks-to-fight-off-covid-19-octa-survey/)  
525 *to-fight-off-covid-19-octa-survey/* (accessed October 15, 2023).

526 Wu SW., Chiang PY. 2023. Exploring the Moderating Effect of Positive and Negative Word-of-Mouth on  
527 the Relationship between Health Belief Model and the Willingness to Receive COVID-19 Vaccine.  
528 *Vaccines* 11. DOI: 10.3390/VACCINES11061027.

529 Wyatt JC. 2000. When to use web-based surveys. *Journal of the American Medical Informatics*  
530 *Association* 7:426–430. DOI: 10.1136/jamia.2000.0070426.

531 Xie J., Tong Z., Guan X., Du B., Qiu H. 2020. Clinical Characteristics of Patients Who Died of  
532 Coronavirus Disease 2019 in China. *JAMA network open* 3:e205619. DOI:  
533 10.1001/jamanetworkopen.2020.5619.

534 Zhu N., Zhang D., Wang W., al. et. 2020. A novel coronavirus from patients with pneumonia in China,  
535 2019. *N Engl J Med* 382:727–733.

536 Zilhada Z., Ariyanti F., Nurmansyah MI., Iriani DU., Dwirahmadi F. 2022. Factors Associated with  
537 COVID-19 Vaccination Acceptance Among Muslim High School Students in Jakarta Metropolitan  
538 Area, Indonesia. *Journal of Multidisciplinary Healthcare* 15:2341–2352. DOI:  
539 10.2147/JMDH.S380171.

| <b>REGION OF THE PHILIPPINES</b> | <b>Number of Responses (n)</b> | <b>Percent of Responses (%)</b> |
|----------------------------------|--------------------------------|---------------------------------|
| BARMM                            | 8                              | 0.2                             |
| CAR                              | 25                             | 0.5                             |
| NCR                              | 2,357                          | 45.9                            |
| Region I                         | 58                             | 1.1                             |
| Region II                        | 30                             | 0.6                             |
| Region III                       | 1,261                          | 24.6                            |
| Region IV-A                      | 1,007                          | 19.6                            |
| Region IV-B                      | 17                             | 0.3                             |
| Region IX                        | 9                              | 0.2                             |
| Region V                         | 22                             | 0.4                             |
| Region VI                        | 62                             | 1.2                             |
| Region VII                       | 35                             | 0.7                             |
| Region VIII                      | 11                             | 0.2                             |
| Region X                         | 46                             | 0.9                             |
| Region XI                        | 135                            | 2.6                             |
| Region XII                       | 47                             | 0.9                             |
| Region XIII                      | 0                              | 0                               |
| <b>TOTAL</b>                     | <b>5,130</b>                   | <b>100</b>                      |

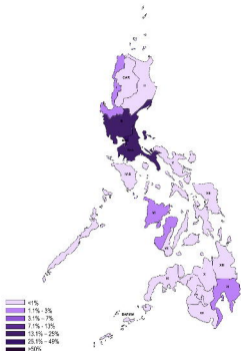

A.

COVID-19 Vaccination Status  
(n=5,130)

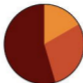

Not Vaccinated (n=856; 16.7%)  
Partially Vaccinated (n=1,476; 28.8%)  
Fully Vaccinated (n=2,798; 54.5%)

B.

COVID-19 Vaccination Intent  
[Caple et al., 2022]  
(n=7,193)

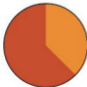

Vaccine Resistance (n=2,696; 37.5%)  
Vaccine Acceptance (n=4,497; 62.5%)

COVID-19 Vaccination Intent  
[This Study]  
(n=5,130)

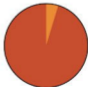

Vaccine Resistance (n=242; 4.7%)  
Vaccine Acceptance (n=4,888; 95.3%)

|                                    | Have you been vaccinated against COVID-19? |                                      |                                                |                                         |
|------------------------------------|--------------------------------------------|--------------------------------------|------------------------------------------------|-----------------------------------------|
|                                    | Overall N (%)                              | Not Vaccinated<br>n = 856<br>(16.7%) | Partially<br>Vaccinated<br>n = 1476<br>(28.8%) | Fully Vaccinated<br>n = 2798<br>(54.5%) |
| <i>Demographics</i>                |                                            |                                      |                                                |                                         |
| <i>Age group (years)</i>           |                                            |                                      |                                                |                                         |
| 18–30                              | 3453 (67.31)                               | 701 (20.3)                           | 1223 (35.4)                                    | 1529 (44.3)                             |
| 31–40                              | 521 (10.16)                                | 41 (7.9)                             | 122 (23.4)                                     | 358 (68.7)                              |
| 41–50                              | 451 (8.79)                                 | 52 (11.5)                            | 65 (14.4)                                      | 334 (74.1)                              |
| 51–99                              | 705 (13.74)                                | 62 (8.8)                             | 66 (9.4)                                       | 577 (81.8)                              |
| <i>Gender</i>                      |                                            |                                      |                                                |                                         |
| Female                             | 3293 (64.19)                               | 616 (18.7)                           | 890 (27)                                       | 1787 (54.3)                             |
| Male                               | 1837 (35.81)                               | 240 (13.1)                           | 586 (31.9)                                     | 1011 (55)                               |
| <i>Marital Status</i>              |                                            |                                      |                                                |                                         |
| Single                             | 3883 (75.69)                               | 741 (19.1)                           | 1292 (33.3)                                    | 1850 (47.6)                             |
| Married                            | 1247 (24.31)                               | 115 (9.2)                            | 184 (14.8)                                     | 948 (76)                                |
| <i>Highest Education Level</i>     |                                            |                                      |                                                |                                         |
| Elementary school or below         | 3 (.06)                                    | 1 (33.3)                             | 2 (66.7)                                       |                                         |
| Junior high school                 | 132 (2.57)                                 | 14 (10.6)                            | 55 (41.7)                                      | 63 (47.7)                               |
| Senior high school                 | 1036 (20.19)                               | 220 (21.2)                           | 412 (39.8)                                     | 404 (39)                                |
| College/university of above        | 3959 (77.17)                               | 621 (15.7)                           | 1007 (25.4)                                    | 2331 (58.9)                             |
| <i>Occupation</i>                  |                                            |                                      |                                                |                                         |
| Blue collar worker                 | 878 (17.12)                                | 64 (7.3)                             | 397 (45.2)                                     | 417 (47.5)                              |
| Profession/white collar worker     | 1627 (31.72)                               | 133 (8.2)                            | 328 (20.2)                                     | 1166 (71.7)                             |
| Self-employed                      | 541 (10.55)                                | 62 (11.5)                            | 209 (38.6)                                     | 270 (49.9)                              |
| Student                            | 1710 (33.33)                               | 548 (32)                             | 465 (27.2)                                     | 697 (40.8)                              |
| Housewife/retired/unemployed/other | 374 (7.29)                                 | 49 (13.1)                            | 77 (20.6)                                      | 248 (66.3)                              |
| <i>Location</i>                    |                                            |                                      |                                                |                                         |
| Rural                              | 1043 (20.33)                               | 257 (24.6)                           | 334 (32)                                       | 452 (43.3)                              |
| Urban                              | 4087 (79.67)                               | 599 (14.7)                           | 1142 (27.9)                                    | 2346 (57.4)                             |

|                                                  |              |            |             |             |
|--------------------------------------------------|--------------|------------|-------------|-------------|
| <i>Experience with COVID-19</i>                  |              |            |             |             |
| Ever tested positive for COVID-19                |              |            |             |             |
| Yes                                              | 334 (6.51)   | 48 (14.4)  | 72 (21.6)   | 214 (64.1)  |
| No                                               | 4796 (93.49) | 808 (16.8) | 1404 (29.3) | 2584 (53.9) |
| Know anyone who has tested positive for COVID-19 |              |            |             |             |
| Yes                                              | 3299 (64.31) | 617 (18.7) | 649 (19.7)  | 2033 (61.6) |
| No                                               | 1831 (35.69) | 239 (13.1) | 827 (45.2)  | 765 (41.8)  |
| <i>Health Characteristics</i>                    |              |            |             |             |
| Have an existing chronic condition               |              |            |             |             |
| Yes                                              | 635 (12.38)  | 81 (12.8)  | 61 (9.6)    | 493 (77.6)  |
| No                                               | 4495 (87.62) | 775 (17.2) | 1415 (31.5) | 2305 (51.3) |
| <b>Perceived overall health</b>                  |              |            |             |             |
| Very good                                        | 2021 (39.4)  | 268 (13.3) | 703 (34.8)  | 1050 (52)   |
| Good                                             | 2466 (48.07) | 436 (17.7) | 650 (26.4)  | 1380 (56)   |
| Fair/Poor/Very poor                              | 643 (12.53)  | 152 (23.6) | 123 (19.1)  | 368 (57.2)  |

|                                    | Have you been vaccinated against COVID-19? |                                      |                                                             |
|------------------------------------|--------------------------------------------|--------------------------------------|-------------------------------------------------------------|
|                                    | Overall N (%)                              | Not Vaccinated<br>n = 856<br>(16.7%) | Partially Vaccinated & Fully Vaccinated<br>n = 4274 (83.3%) |
| <i>Demographics</i>                |                                            |                                      |                                                             |
| Age group (years)                  |                                            |                                      |                                                             |
| 18–30                              | 3453 (67.31)                               | 701 (20.3)                           | 2752 (79.7)                                                 |
| 31–40                              | 521 (10.16)                                | 41 (7.9)                             | 480 (92.1)                                                  |
| 41–50                              | 451 (8.79)                                 | 52 (11.5)                            | 399 (88.5)                                                  |
| 51–99                              | 705 (13.74)                                | 62 (8.8)                             | 643 (91.2)                                                  |
| Gender                             |                                            |                                      |                                                             |
| Female                             | 3293 (64.19)                               | 616 (18.7)                           | 2677 (81.3)                                                 |
| Male                               | 1837 (35.81)                               | 240 (13.1)                           | 1597 (86.9)                                                 |
| Marital Status                     |                                            |                                      |                                                             |
| Single                             | 3883 (75.69)                               | 741 (19.1)                           | 3142 (80.9)                                                 |
| Married                            | 1247 (24.31)                               | 115 (9.2)                            | 1132 (90.8)                                                 |
| Highest Education Level            |                                            |                                      |                                                             |
| Elementary school or below         | 3 (.06)                                    | 1 (33.3)                             | 2 (66.7)                                                    |
| Junior high school                 | 132 (2.57)                                 | 14 (10.6)                            | 118 (89.4)                                                  |
| Senior high school                 | 1036 (20.19)                               | 220 (21.2)                           | 816 (78.8)                                                  |
| College/university of above        | 3959 (77.17)                               | 621 (15.7)                           | 3338 (84.3)                                                 |
| Occupation                         |                                            |                                      |                                                             |
| Blue collar worker                 | 878 (17.12)                                | 64 (7.3)                             | 814 (92.7)                                                  |
| Profession/white collar worker     | 1627 (31.72)                               | 133 (8.2)                            | 1494 (91.8)                                                 |
| Self-employed                      | 541 (10.55)                                | 62 (11.5)                            | 479 (88.5)                                                  |
| Student                            | 1710 (33.33)                               | 548 (32)                             | 1162 (68)                                                   |
| Housewife/retired/unemployed/other | 374 (7.29)                                 | 49 (13.1)                            | 325 (86.9)                                                  |
| Location                           |                                            |                                      |                                                             |
| Rural                              | 1043 (20.33)                               | 257 (24.6)                           | 786 (75.4)                                                  |
| Urban                              | 4087 (79.67)                               | 599 (14.7)                           | 3488 (85.3)                                                 |

|                                                  |              |            |             |
|--------------------------------------------------|--------------|------------|-------------|
| <i>Experience with COVID-19</i>                  |              |            |             |
| Ever tested positive for COVID-19                |              |            |             |
| Yes                                              | 334 (6.51)   | 48 (14.4)  | 286 (85.6)  |
| No                                               | 4796 (93.49) | 808 (16.8) | 3988 (83.2) |
| Know anyone who has tested positive for COVID-19 |              |            |             |
| Yes                                              | 3299 (64.31) | 617 (18.7) | 2682 (81.3) |
| No                                               | 1831 (35.69) | 239 (13.1) | 1592 (86.9) |
| <i>Health Characteristics</i>                    |              |            |             |
| Have an existing chronic condition               |              |            |             |
| Yes                                              | 635 (12.38)  | 81 (12.8)  | 554 (87.2)  |
| No                                               | 4495 (87.62) | 775 (17.2) | 3720 (82.8) |
| <b>Perceived overall health</b>                  |              |            |             |
| Very good                                        | 2021 (39.4)  | 268 (13.3) | 1753 (86.7) |
| Good                                             | 2466 (48.07) | 436 (17.7) | 2030 (82.3) |
| Fair/Poor/Very poor                              | 643 (12.53)  | 152 (23.6) | 491 (76.4)  |

| <b>Perceived Susceptibility to COVID-19</b>                                                                                                           | <b>% Strongly Agree/Agree (This Study)</b> | <b>% Strongly Agree/Agree (Caple et al., 2022)</b> |
|-------------------------------------------------------------------------------------------------------------------------------------------------------|--------------------------------------------|----------------------------------------------------|
| Chance of getting COVID-19 in the next few months is high                                                                                             | 42.81                                      | 31.5                                               |
| Worried about the likelihood of getting COVID-19                                                                                                      | 81.05                                      | 84.1                                               |
| Worried about the likelihood of someone in my family getting COVID-19                                                                                 | 86.61                                      | NA                                                 |
| <b>Perceived Severity of COVID-19</b>                                                                                                                 |                                            |                                                    |
| COVID-19 is a serious disease with life-threatening complications                                                                                     | 95.91                                      | 96.3                                               |
| I will be very sick if I get COVID-19                                                                                                                 | 72.12                                      | 75                                                 |
| I am afraid of getting COVID-19                                                                                                                       | 92.73                                      | 93.1                                               |
| I am afraid that someone in my family will get COVID-19                                                                                               | 95.59                                      | NA                                                 |
| <b>Perceived Benefits of Vaccination</b>                                                                                                              |                                            |                                                    |
| Vaccination will decrease my chances of getting COVID-19                                                                                              | 87.35                                      | 88.1                                               |
| Vaccination will decrease my worries about catching COVID-19                                                                                          | 87.78                                      | 84.5                                               |
| <b>Perceived Barriers to Vaccination</b>                                                                                                              |                                            |                                                    |
| I worry about the possible side-effects of the COVID-19 vaccine                                                                                       | 68.13                                      | 89.6                                               |
| I worry about the effectiveness of the COVID-19 vaccine                                                                                               | 68.32                                      | 87.1                                               |
| I worry about the safety of the COVID-19 vaccine                                                                                                      | 63.7                                       | 88.8                                               |
| I worry about the high cost of the COVID-19 vaccine                                                                                                   | 63.14                                      | 78                                                 |
| I worry about fake COVID-19 vaccines                                                                                                                  | 88.52                                      | 97.4                                               |
| I worry that the COVID-19 vaccines were made too quickly                                                                                              | 59.57                                      | NA                                                 |
| I worry that the COVID-19 vaccines were not tested properly                                                                                           | 55.13                                      | NA                                                 |
| I worry that the COVID-19 vaccines will make me sick                                                                                                  | 50.37                                      | 68.4                                               |
| I worry that the COVID-19 vaccines will not be effective against new variants of the virus                                                            | 75.48                                      | 80                                                 |
| <b>Cues to Action for COVID-19 Vaccination</b>                                                                                                        |                                            |                                                    |
| Rewarding fully vaccinated individuals with <i>bakuna</i> benefits would encourage me to get vaccinated against COVID-19                              | 79.96                                      |                                                    |
| Rewarding fully vaccinated individuals with more freedom to move around and to meet with people would encourage me to get vaccinated against COVID-19 | 78.75                                      |                                                    |
| Rewarding fully vaccinated individuals by allowing them to remove masks in the company of other fully vaccinated individuals would                    | 58.69                                      |                                                    |



|                                                                                          |       |  |
|------------------------------------------------------------------------------------------|-------|--|
| encourage me to get vaccinated against COVID-19                                          |       |  |
| Testimonies from fully vaccinated people have encouraged me to get vaccinated            | 87.5  |  |
| Seeing my family members and friends get vaccinated has encouraged me to get the vaccine | 90.14 |  |
| Seeing famous people get vaccinated on social media has encouraged me to get the vaccine | 62.83 |  |

**TABLE 2: RESPONDENTS' HEALTH BELIEFS REGARDING COVID-19 AND ITS VACCINES**

**TABLE 3: CHANGES IN RESPONDENTS' HEALTH BELIEFS  
REGARDING COVID-19 AND ITS VACCINES**

| <b>Perceived Susceptibility to COVID-19</b>                                                                                   | <b>% Strongly Agree/Agree</b> |
|-------------------------------------------------------------------------------------------------------------------------------|-------------------------------|
| Chance of getting COVID-19 now is lower than it was six months ago                                                            | 73                            |
| Less worried about the likelihood of getting COVID-19 now than I was six months ago                                           | 67.2                          |
| Less worried about the likelihood of someone in my family getting COVID-19 now than I was six months ago                      | 63.2                          |
| Less afraid of getting COVID-19 now than I was six months ago                                                                 | 63.8                          |
| Less afraid that someone in my family will get COVID-19 now than I was six months ago                                         | 61.2                          |
| <b>Perceived Barriers to Vaccination</b>                                                                                      |                               |
| I worry less about the possible side-effects of the COVID-19 vaccine now than I was six months ago                            | 78.8                          |
| I worry less about the effectiveness of the COVID-19 vaccine now than I was six months ago                                    | 76.7                          |
| I worry less about the safety of the COVID-19 vaccine now than I was six months ago                                           | 78.6                          |
| I worry less about fake COVID-19 vaccines now than I was six months ago                                                       | 64.4                          |
| I worry less that the COVID-19 vaccines were not tested properly now than I was six months ago                                | 70.6                          |
| I worry less that the COVID-19 vaccines were made too quickly now than I was six months ago                                   | 70.2                          |
| I worry less that the COVID-19 vaccines will make me sick now than I was six months ago                                       | 72.0                          |
| I worry less that the COVID-19 vaccines will not be effective against new variants of the virus now than I was six months ago | 62.2                          |
| <b>Vaccination Intent</b>                                                                                                     |                               |
| Are you more willing to take a COVID-19 vaccine now than you were 6 months ago?                                               | 92.3                          |

|                                |               | Univariable analysis           |                                                          |                        |         | Multivariable logistic regression                            |         |                                                          |         |
|--------------------------------|---------------|--------------------------------|----------------------------------------------------------|------------------------|---------|--------------------------------------------------------------|---------|----------------------------------------------------------|---------|
|                                | Overall N (%) | Not Vaccinated n = 856 (16.7%) | Partially Vaccinated & Fully Vaccinated n = 4274 (83.3%) | Unadjusted OR [95% CI] | p-value | Not Vaccinated vs. Partially Vaccinated Adjusted OR [95% CI] | p-value | Not Vaccinated vs. Fully Vaccinated Adjusted OR [95% CI] | p-value |
| <i>Demographics</i>            |               |                                |                                                          |                        |         |                                                              |         |                                                          |         |
| <i>Age group (years)</i>       |               |                                |                                                          |                        |         |                                                              |         |                                                          |         |
| 18–30                          | 3453 (67.31)  | 701 (20.3)                     | 2752 (79.7)                                              | .379 [.288, .498]      | < .001  | .782 [.406, 1.506]                                           | .463    | .251 [.137, .461]                                        | < .001  |
| 31–40                          | 521 (10.16)   | 41 (7.9)                       | 480 (92.1)                                               | 1.129 [.748, 1.704]    | .564    | 1.105 [.562, 2.172]                                          | .772    | .500 [.268, .934]                                        | .030    |
| 41–50                          | 451 (8.79)    | 52 (11.5)                      | 399 (88.5)                                               | .740 [.501, 1.092]     | .129    | .680 [.351, 1.315]                                           | .680    | .448 [.248, .809]                                        | .008    |
| 51–99                          | 705 (13.74)   | 62 (8.8)                       | 643 (91.2)                                               | Reference              |         | Reference                                                    |         | Reference                                                |         |
| <i>Gender</i>                  |               |                                |                                                          |                        |         |                                                              |         |                                                          |         |
| Female                         | 3293 (64.19)  | 616 (18.7)                     | 2677 (81.3)                                              | .653 [.556, .768]      | <.001   | .774 [.612, .978]                                            | .032    | .775 [.618, .972]                                        | .028    |
| Male                           | 1837 (35.81)  | 240 (13.1)                     | 1597 (86.9)                                              | Reference              |         | Reference                                                    |         | Reference                                                |         |
| <i>Marital Status</i>          |               |                                |                                                          |                        |         |                                                              |         |                                                          |         |
| Single                         | 3883 (75.69)  | 741 (19.1)                     | 3142 (80.9)                                              | .431 [.350, .530]      | < .001  | 1.216 [.758, 1.950]                                          | .418    | .948 [.608, 1.477]                                       | .814    |
| Married                        | 1247 (24.31)  | 115 (9.2)                      | 1132 (90.8)                                              | Reference              |         | Reference                                                    |         | Reference                                                |         |
| <i>Highest Education Level</i> |               |                                |                                                          |                        |         |                                                              |         |                                                          |         |
| Elementary school or below     | 3 (.06)       | 1 (33.3)                       | 2 (66.7)                                                 | .372 [.034, 4.110]     | .420    | .432 [.036, 5.163]                                           | .508    | n too small to calculate                                 |         |
| Junior high school             | 132 (2.57)    | 14 (10.6)                      | 118 (89.4)                                               | 1.568 [.895, 2.747]    | .116    | 1.367 [.559, 3.343]                                          | .494    | 1.463 [.596, 3.590]                                      | .406    |
| Senior high school             | 1036 (20.19)  | 220 (21.2)                     | 816 (78.8)                                               | .690 [.581, .819]      | < .001  | 1.199 [.929, 1.547]                                          | .164    | .914 [.710, 1.176]                                       | .483    |
| College/university or above    | 3959 (77.17)  | 621 (15.7)                     | 3338 (84.3)                                              | Reference              |         | Reference                                                    |         | Reference                                                |         |
| <i>Occupation</i>              |               |                                |                                                          |                        |         |                                                              |         |                                                          |         |

|                                                         |                 |            |                |                         |        |                     |        |                         |        |
|---------------------------------------------------------|-----------------|------------|----------------|-------------------------|--------|---------------------|--------|-------------------------|--------|
| Blue collar worker                                      | 878<br>(17.12)  | 64 (7.3)   | 814 (92.7)     | 1.918 [1.294,<br>2.843] | .001   | 1.262 [.669, 2.380] | .472   | 1.414 [.760, 2.625]     | .272   |
| Professional/white collar worker                        | 1627<br>(31.72) | 133 (8.2)  | 1494<br>(91.8) | 1.694 [1.195,<br>2.400] | .003   | .951 [.543, 1.666]  | .860   | 1.375 [.807, 2.343]     | .241   |
| Self-employed                                           | 541<br>(10.55)  | 62 (11.5)  | 479 (88.5)     | 1.165 [.781,<br>1.738]  | .455   | 1.123 [.593, 2.129] | .721   | 1.101 [.594, 2.040]     | .761   |
| Student                                                 | 1710<br>(33.33) | 548 (32)   | 1162 (68)      | .320 [.233,<br>.439]    | < .001 | .247 [.140, .433]   | < .001 | .297 [.172, .511]       | < .001 |
| Housewife/retired/unemployed/other                      | 374<br>(7.29)   | 49 (13.1)  | 325 (86.9)     | Reference               |        | Reference           |        | Reference               |        |
| <b>Location</b>                                         |                 |            |                |                         |        |                     |        |                         |        |
| Rural                                                   | 1043<br>(20.33) | 257 (24.6) | 786 (75.4)     | .525 [.445,<br>.620]    | <.001  | .876 [.689, 1.113]  | .278   | .661 [.523, .863]       | < .001 |
| Urban                                                   | 4087<br>(79.67) | 599 (14.7) | 3488<br>(85.3) | Reference               |        | Reference           |        | Reference               |        |
| <i>Experience with COVID-19</i>                         |                 |            |                |                         |        |                     |        |                         |        |
| <b>Ever tested positive for COVID-19</b>                |                 |            |                |                         |        |                     |        |                         |        |
| Yes                                                     | 334<br>(6.51)   | 48 (14.4)  | 286 (85.6)     | 1.207 [.881,<br>1.654]  | .241   |                     |        |                         |        |
| No                                                      | 4796<br>(93.49) | 808 (16.8) | 3988<br>(83.2) | Reference               |        |                     |        |                         |        |
| <b>Know anyone who has tested positive for COVID-19</b> |                 |            |                |                         |        |                     |        |                         |        |
| Yes                                                     | 3299<br>(64.31) | 617 (18.7) | 2682<br>(81.3) | .653 [.555,<br>.767]    | < .001 | .491 [.377, .640]   | < .001 | .861 [.662, 1.119]      | .263   |
| No                                                      | 1831<br>(35.69) | 239 (13.1) | 1592<br>(86.9) | Reference               |        | Reference           |        |                         |        |
| <i>Health Characteristics</i>                           |                 |            |                |                         |        |                     |        |                         |        |
| <b>Have an existing chronic condition</b>               |                 |            |                |                         |        |                     |        |                         |        |
| Yes                                                     | 635<br>(12.38)  | 81 (12.8)  | 554 (87.3)     | 1.425 [1.115,<br>1.822] | .005   | .770 [.498, 1.188]  | .237   | 1.503 [1.036,<br>2.182] | .032   |
| No                                                      | 4495<br>(87.62) | 775 (17.2) | 3720<br>(82.2) | Reference               |        | Reference           |        | Reference               |        |
| <b>Perceived overall health</b>                         |                 |            |                |                         |        |                     |        |                         |        |
| Very good                                               | 2021<br>(39.4)  | 268 (13.3) | 1753<br>(86.7) | Reference               |        | Reference           |        | Reference               |        |
| Good                                                    | 2466            | 436 (17.7) | 2030           | .712 [.604,<br>]        | < .001 | .915 [.718, 1.164]  | .469   | .900 [.711, 1.139]      | .379   |

|                                                                        |                 |            |                |                        |        |                    |        |                    |        |
|------------------------------------------------------------------------|-----------------|------------|----------------|------------------------|--------|--------------------|--------|--------------------|--------|
|                                                                        | (48.07)         |            | (82.3)         | .840]                  |        |                    |        |                    |        |
| Fair/Poor/Very poor                                                    | 643<br>(12.53)  | 152 (23.6) | 491 (76.4)     | .494 [.395,<br>.617]   | < .001 | .835 [.587, 1.187] | .315   | .930 [.669, 1.292] | .664   |
| <b>Openness to the COVID-19 Vaccine</b>                                |                 |            |                |                        |        |                    |        |                    |        |
| Would you take a COVID-19 vaccine                                      |                 |            |                |                        |        |                    |        |                    |        |
| Definitely yes/probably yes                                            | 4888<br>(95.28) | 646 (13.2) | 4242<br>(86.8) | Reference              |        | Reference          |        | Reference          |        |
| Unsure/probably no/definitely no                                       | 242<br>(4.72)   | 210 (86.8) | 32 (13.2)      | .023 [.016,<br>.034]   | < .001 | .016 [.008, .032]  | < .001 | .012 [.006, .024]  | < .001 |
| More willing to take a COVID-19 vaccine now than you were 6 months ago |                 |            |                |                        |        |                    |        |                    |        |
| Definitely yes/probably yes                                            | 4733<br>(92.26) | 633 (13.4) | 4100<br>(86.6) | Reference              |        | Reference          |        | Reference          |        |
| Unsure/probably no/definitely no                                       | 397<br>(7.74)   | 223 (56.2) | 174 (43.8)     | .120 [.097,<br>.149]   | < .001 | .531 [.335, .842]  | .007   | .488 [.311, .766]  | .002   |
| Do you know someone who has been vaccinated against COVID-19           |                 |            |                |                        |        |                    |        |                    |        |
| Yes                                                                    | 4923<br>(95.96) | 834 (16.9) | 4089<br>(83.1) | .583 [.372,<br>.913]   | .018   | .467 [.236, .922]  | .028   | .444 [.222, .886]  | .021   |
| No                                                                     | 207<br>(4.04)   | 22 (10.6)  | 185 (89.4)     | Reference              |        | Reference          |        | Reference          |        |
| <i>Health Belief</i>                                                   |                 |            |                |                        |        |                    |        |                    |        |
| <b>Perceived susceptibility</b>                                        |                 |            |                |                        |        |                    |        |                    |        |
| Chance of getting COVID-19 in the next few months is high              |                 |            |                |                        |        |                    |        |                    |        |
| Strongly agree/agree                                                   | 2196<br>(42.81) | 386 (17.6) | 1810<br>(82.4) | Reference              |        |                    |        |                    |        |
| Disagree/strongly disagree                                             | 2934<br>(57.19) | 470 (16)   | 2464 (84)      | 1.118 [.965,<br>1.296] | .139   |                    |        |                    |        |
| Worried about the likelihood of getting COVID-19                       |                 |            |                |                        |        |                    |        |                    |        |
| Strongly agree/agree                                                   | 4158<br>(81.05) | 693 (16.7) | 3465<br>(83.3) | Reference              |        |                    |        |                    |        |
| Disagree/strongly disagree                                             | 972<br>(18.95)  | 163 (16.8) | 809 (83.2)     | .993 [.823,<br>1.197]  | .938   |                    |        |                    |        |
| Worried about the likelihood of someone in my family getting COVID-    |                 |            |                |                        |        |                    |        |                    |        |





|                                                                 |                 |            |                |                      |        |                     |      |                      |        |
|-----------------------------------------------------------------|-----------------|------------|----------------|----------------------|--------|---------------------|------|----------------------|--------|
| I worry about the possible side-effects of the COVID-19 vaccine |                 |            |                |                      |        |                     |      |                      |        |
| Strongly agree/agree                                            | 3495<br>(68.13) | 652 (18.7) | 2843<br>(81.3) | Reference            |        | Reference           |      | Reference            |        |
| Disagree/strongly disagree                                      | 1635<br>(31.87) | 204 (12.5) | 1431<br>(87.5) | 1.609 [1.358, 1.906] | < .001 | 1.002 [.751, 1.338] | .988 | 1.666 [1.271, 2.184] | < .001 |
| I worry about the effectiveness of the COVID-19 vaccine         |                 |            |                |                      |        |                     |      |                      |        |
| Strongly agree/agree                                            | 3505<br>(68.32) | 632 (18)   | 2873 (82)      | Reference            |        | Reference           |      | Reference            |        |
| Disagree/strongly disagree                                      | 1625<br>(31.68) | 224 (13.8) | 1401<br>(86.2) | 1.376 [1.166, 1.623] | < .001 | 1.054 [.770, 1.443] | .744 | .929 [.690, 1.250]   | .625   |
| I worry about the safety of the COVID-19 vaccine                |                 |            |                |                      |        |                     |      |                      |        |
| Strongly agree/agree                                            | 3268<br>(63.7)  | 598 (18.3) | 2670<br>(81.7) | Reference            |        | Reference           |      | Reference            |        |
| Disagree/strongly disagree                                      | 1862<br>(36.3)  | 258 (13.9) | 1604<br>(86.1) | 1.392 [1.188, 1.632] | < .001 | .838 [.604, 1.161]  | .287 | .910 [.667, 1.242]   | .552   |
| I worry about the high cost of the COVID-19 vaccine             |                 |            |                |                      |        |                     |      |                      |        |
| Strongly agree/agree                                            | 3239<br>(63.14) | 534 (16.5) | 2705<br>(83.5) | Reference            |        |                     |      |                      |        |
| Disagree/strongly disagree                                      | 1891<br>(36.86) | 322 (17)   | 1569 (83)      | .962 [.827, 1.119]   | .616   |                     |      |                      |        |
| I worry about fake COVID-19 vaccines                            |                 |            |                |                      |        |                     |      |                      |        |
| Strongly agree/agree                                            | 4541<br>(88.52) | 773 (17)   | 3768 (83)      | Reference            |        |                     |      |                      |        |
| Disagree/strongly disagree                                      | 589<br>(11.48)  | 83 (14.1)  | 506 (85.9)     | 1.251 [.979, 1.597]  | .073   |                     |      |                      |        |
| I worry that the COVID-19 vaccines were made too quickly        |                 |            |                |                      |        |                     |      |                      |        |
| Strongly agree/agree                                            | 3056<br>(59.57) | 533 (17.4) | 1751<br>(82.6) | Reference            |        |                     |      |                      |        |
| Disagree/strongly disagree                                      | 2074<br>(40.43) | 323 (15.6) | 2523<br>(84.4) | 1.145 [.985, 1.332]  | .078   |                     |      |                      |        |
| I worry that the COVID-19 vaccines were not tested properly     |                 |            |                |                      |        |                     |      |                      |        |
| Strongly agree/agree                                            | 2828            | 522 (18.5) | 2306           | Reference            |        | Reference           |      | Reference            |        |







|                                                                                                                                                                                    |                 |            |                |                      |        |                     |      |                     |      |
|------------------------------------------------------------------------------------------------------------------------------------------------------------------------------------|-----------------|------------|----------------|----------------------|--------|---------------------|------|---------------------|------|
| Strongly agree/agree                                                                                                                                                               | 4102<br>(79.96) | 573 (14)   | 3529 (86)      | Reference            |        | Reference           |      | Reference           |      |
| Disagree/strongly disagree                                                                                                                                                         | 1028<br>(20.04) | 283 (27.5) | 745 (72.5)     | .427 [.363,<br>.503] | < .001 | .909 [.664, 1.245]  | .554 | .808 [.600, 1.090]  | .163 |
| Rewarding fully vaccinated individuals with more freedom to move around and to meet with people would encourage me to get vaccinated against COVID-19                              |                 |            |                |                      |        |                     |      |                     |      |
| Strongly agree/agree                                                                                                                                                               | 4040<br>(78.75) | 550 (13.6) | 3490<br>(86.4) | Reference            |        | Reference           |      | Reference           |      |
| Disagree/strongly disagree                                                                                                                                                         | 1090<br>(21.25) | 306 (28.1) | 784 (71.9)     | .404 [.344,<br>.474] | < .001 | .926 [.668, 1.282]  | .642 | .864 [.636, 1.175]  | .351 |
| Rewarding fully vaccinated individuals by allowing them to remove masks in the company of other fully vaccinated individuals would encourage me to get vaccinated against COVID-19 |                 |            |                |                      |        |                     |      |                     |      |
| Strongly agree/agree                                                                                                                                                               | 3011<br>(58.69) | 415 (13.8) | 2596<br>(86.2) | Reference            |        | Reference           |      | Reference           |      |
| Disagree/strongly disagree                                                                                                                                                         | 2119<br>(41.31) | 441 (20.8) | 1678<br>(79.2) | .608 [.525,<br>.705] | < .001 | .897 [.680, 1.184]  | .442 | .932 [.716, 1.213]  | .599 |
| Testimonies from fully vaccinated people have encouraged me to get vaccinated                                                                                                      |                 |            |                |                      |        |                     |      |                     |      |
| Strongly agree/agree                                                                                                                                                               | 4489<br>(87.5)  | 647 (14.4) | 3842<br>(85.6) | Reference            |        | Reference           |      | Reference           |      |
| Disagree/strongly disagree                                                                                                                                                         | 641<br>(12.5)   | 209 (32.6) | 432 (67.4)     | .348 [.289,<br>.419] | < .001 | .892 [.577, 1.380]  | .608 | .809 [.534, 1.226]  | .317 |
| Seeing my family members and friends get vaccinated has encouraged me to get the vaccine                                                                                           |                 |            |                |                      |        |                     |      |                     |      |
| Strongly agree/agree                                                                                                                                                               | 4624<br>(90.14) | 691 (14.9) | 3933<br>(85.1) | Reference            |        | Reference           |      | Reference           |      |
| Disagree/strongly disagree                                                                                                                                                         | 506<br>(9.86)   | 165 (32.6) | 341 (67.4)     | .363 [.296,<br>.445] | < .001 | 1.355 [.815, 2.253] | .242 | 1.211 [.739, 1.983] | .447 |
| Seeing famous people get vaccinated on social media has encouraged me to get the vaccine                                                                                           |                 |            |                |                      |        |                     |      |                     |      |
| Strongly agree/agree                                                                                                                                                               | 3223<br>(62.83) | 443 (13.7) | 2780<br>(86.3) | Reference            |        | Reference           |      | Reference           |      |

|                                                                                |                 |            |                |                      |        |                         |      |                     |        |
|--------------------------------------------------------------------------------|-----------------|------------|----------------|----------------------|--------|-------------------------|------|---------------------|--------|
| Disagree/strongly disagree                                                     | 1907<br>(37.17) | 413 (21.7) | 1494<br>(78.3) | .576 [.497,<br>.668] | < .001 | 1.320 [1.021,<br>1.707] | .034 | 1.279 [.999, 1.636] | .051   |
| I think the national government has managed this COVID-19 vaccination campaign |                 |            |                |                      |        |                         |      |                     |        |
| Strongly agree/agree                                                           | 2727<br>(53.16) | 300 (11)   | 2427 (89)      | Reference            |        | Reference               |      | Reference           |        |
| Disagree/strongly disagree                                                     | 2403<br>(46.84) | 556 (23.1) | 1847<br>(76.9) | .411 [.352,<br>.478] | < .001 | .957 [.723, 1.266]      | .757 | 1.012 [.775, 1.321] | .932   |
| I think my LGU has effectively managed this COVID-19 vaccination campaign      |                 |            |                |                      |        |                         |      |                     |        |
| Strongly agree/agree                                                           | 3503<br>(68.28) | 390 (11.1) | 3113<br>(88.9) | Reference            |        | Reference               |      | Reference           |        |
| Disagree/strongly disagree                                                     | 1627<br>(31.72) | 466 (28.6) | 1161<br>(71.4) | .312 [.269,<br>.363] | < .001 | .645 [.497, .839]       | .001 | .464 [.362, .593]   | < .001 |

|                                    | Factors associated with COVID-19 vaccine status after national vaccine rollout |                                |                                                          |                                         | Factors Associated with intention to take the COVID-19 vaccine before national vaccine rollout (Caple et al., 2022) |                               |                                   |                                         |
|------------------------------------|--------------------------------------------------------------------------------|--------------------------------|----------------------------------------------------------|-----------------------------------------|---------------------------------------------------------------------------------------------------------------------|-------------------------------|-----------------------------------|-----------------------------------------|
|                                    | Overall N (%)                                                                  | Not Vaccinated n = 856 (16.7%) | Partially Vaccinated & Fully Vaccinated n = 4274 (83.3%) | Individual Predictor of vaccine status? | Overall N (%)                                                                                                       | Vaccine hesitant n = 2696 (%) | Not vaccine hesitant n = 4497 (%) | Individual Predictor of vaccine intent? |
| <i>Demographics</i>                |                                                                                |                                |                                                          |                                         |                                                                                                                     |                               |                                   |                                         |
| Age group (years)                  |                                                                                |                                |                                                          | Yes                                     |                                                                                                                     |                               |                                   | No                                      |
| 18–30                              | 3453 (67.31)                                                                   | 701 (20.3)                     | 2752 (79.7)                                              |                                         | 3770 (52.4)                                                                                                         | 1405 (37.3)                   | 2365 (62.7)                       |                                         |
| 31–40                              | 521 (10.16)                                                                    | 41 (7.9)                       | 480 (92.1)                                               |                                         | 815 (11.3)                                                                                                          | 306 (37.5)                    | 509 (62.5)                        |                                         |
| 41–50                              | 451 (8.79)                                                                     | 52 (11.5)                      | 399 (88.5)                                               |                                         | 861 (12)                                                                                                            | 335 (38.9)                    | 526 (61.1)                        |                                         |
| 51–99                              | 705 (13.74)                                                                    | 62 (8.8)                       | 643 (91.2)                                               |                                         | 1747 (24.29)                                                                                                        | 650 (37.21)                   | 1097 (62.79)                      |                                         |
| Gender                             |                                                                                |                                |                                                          | Yes                                     |                                                                                                                     |                               |                                   | Yes                                     |
| Female                             | 3293 (64.19)                                                                   | 616 (18.7)                     | 2677 (81.3)                                              |                                         | 4789 (66.6)                                                                                                         | 1955 (40.8)                   | 2834 (59.2)                       |                                         |
| Male                               | 1837 (35.81)                                                                   | 240 (13.1)                     | 1597 (86.9)                                              |                                         | 2404 (33.4)                                                                                                         | 741 (30.8)                    | 1663 (69.2)                       |                                         |
| Marital Status                     |                                                                                |                                |                                                          | Yes                                     |                                                                                                                     |                               |                                   | Yes                                     |
| Single                             | 3883 (75.69)                                                                   | 741 (19.1)                     | 3142 (80.9)                                              |                                         | 4724 (65.7)                                                                                                         | 1719 (36.4)                   | 3005 (63.6)                       |                                         |
| Married                            | 1247 (24.31)                                                                   | 115 (9.2)                      | 1132 (90.8)                                              |                                         | 2469 (34.3)                                                                                                         | 977 (39.6)                    | 1492 (60.4)                       |                                         |
| Highest Education Level            |                                                                                |                                |                                                          | Yes                                     |                                                                                                                     |                               |                                   | Yes                                     |
| Elementary school or below         | 3 (.06)                                                                        | 1 (33.3)                       | 2 (66.7)                                                 |                                         | 1                                                                                                                   | 1                             |                                   |                                         |
| Junior high school                 | 132 (2.57)                                                                     | 14 (10.6)                      | 118 (89.4)                                               |                                         | 46 (.6)                                                                                                             | 29 (63)                       | 17 (37)                           |                                         |
| Senior high school                 | 1036 (20.19)                                                                   | 220 (21.2)                     | 816 (78.8)                                               |                                         | 1102 (15.3)                                                                                                         | 378 (34.3)                    | 724 (65.7)                        |                                         |
| College/university or above        | 3959 (77.17)                                                                   | 621 (15.7)                     | 3338 (84.3)                                              |                                         | 6044 (84)                                                                                                           | 2288 (37.9)                   | 3756 (62.1)                       |                                         |
| Occupation                         |                                                                                |                                |                                                          | Yes                                     |                                                                                                                     |                               |                                   | Yes                                     |
| Blue collar worker                 | 878 (17.12)                                                                    | 64 (7.3)                       | 814 (92.7)                                               |                                         | 91 (1.3)                                                                                                            | 42 (46.2)                     | 49 (53.8)                         |                                         |
| Professional/white collar worker   | 1627 (31.72)                                                                   | 133 (8.2)                      | 1494 (91.8)                                              |                                         | 2980 (41.4)                                                                                                         | 1133 (38)                     | 1847 (62)                         |                                         |
| Self-employed                      | 541 (10.55)                                                                    | 62 (11.5)                      | 479 (88.5)                                               |                                         | 575 (8)                                                                                                             | 254 (44.2)                    | 321 (55.8)                        |                                         |
| Student                            | 1710 (33.33)                                                                   | 548 (32)                       | 1162 (68)                                                |                                         | 2831 (39.4)                                                                                                         | 976 (34.5)                    | 1855 (65.5)                       |                                         |
| Housewife/retired/unemployed/other | 374 (7.29)                                                                     | 49 (13.1)                      | 325 (86.9)                                               |                                         | 716 (10)                                                                                                            | 291 (40.6)                    | 425 (59.4)                        |                                         |
| Location                           |                                                                                |                                |                                                          | Yes                                     |                                                                                                                     |                               |                                   | Yes                                     |
| Rural                              | 1043 (20.33)                                                                   | 257 (24.6)                     | 786 (75.4)                                               |                                         | 1517 (21.1)                                                                                                         | 711 (46.9)                    | 806 (53.1)                        |                                         |
| Urban                              | 4087                                                                           | 599 (14.7)                     | 3488 (85.3)                                              |                                         | 5676                                                                                                                | 1985 (35)                     | 3691 (65)                         |                                         |

|                                                                   |                 |            |             |     |                 |             |                |     |
|-------------------------------------------------------------------|-----------------|------------|-------------|-----|-----------------|-------------|----------------|-----|
|                                                                   | (79.67)         |            |             |     | (78.9)          |             |                |     |
| <i>Experience with COVID-19</i>                                   |                 |            |             |     |                 |             |                |     |
| Ever tested positive for COVID-19                                 |                 |            |             | No  |                 |             |                | No  |
| Yes                                                               | 334<br>(6.51)   | 48 (14.4)  | 286 (85.6)  |     | 211<br>(2.9)    | 68 (32.2)   | 143 (67.8)     |     |
| No                                                                | 4796<br>(93.49) | 808 (16.8) | 3988 (83.2) |     | 6982<br>(97.1)  | 2628 (37.6) | 4354<br>(62.4) |     |
| Know anyone who has tested positive for COVID-19                  |                 |            |             | Yes |                 |             |                | Yes |
| Yes                                                               | 3299<br>(64.31) | 617 (18.7) | 2682 (81.3) |     | 5234<br>(72.8)  | 1780 (34)   | 3454 (66)      |     |
| No                                                                | 1831<br>(35.69) | 239 (13.1) | 1592 (86.9) |     | 1959<br>(27.2)  | 916 (46.8)  | 1043<br>(53.2) |     |
| <i>Health Characteristics</i>                                     |                 |            |             |     |                 |             |                |     |
| Have an existing chronic condition                                |                 |            |             | Yes |                 |             |                | Yes |
| Yes                                                               | 635<br>(12.38)  | 81 (12.8)  | 554 (87.3)  |     | 1178<br>(16.4)  | 396 (33.6)  | 782 (66.4)     |     |
| No                                                                | 4495<br>(87.62) | 775 (17.2) | 3720 (82.2) |     | 6015<br>(83.6)  | 2300 (38.2) | 3715<br>(61.8) |     |
| <b>Perceived overall health</b>                                   |                 |            |             | Yes |                 |             |                | Yes |
| Very good                                                         | 2021<br>(39.4)  | 268 (13.3) | 1753 (86.7) |     | 1997<br>(27.8)  | 802 (40.2)  | 1195<br>(59.8) |     |
| Good                                                              | 2466<br>(48.07) | 436 (17.7) | 2030 (82.3) |     | 3934<br>(54.7)  | 1376 (35)   | 2558 (65)      |     |
| Fair/Poor/Very poor                                               | 643<br>(12.53)  | 152 (23.6) | 491 (76.4)  |     | 1262<br>(17.5)  | 518 (41)    | 744 (59)       |     |
| <i>Health Belief</i>                                              |                 |            |             |     |                 |             |                |     |
| <b>Perceived susceptibility</b>                                   |                 |            |             |     |                 |             |                |     |
| Chance of getting COVID-19 in the next few months is high         |                 |            |             | No  |                 |             |                | Yes |
| Strongly agree/agree                                              | 2196<br>(42.81) | 386 (17.6) | 1810 (82.4) |     | 2264<br>(31.5)  | 1595 (70.5) | 669 (29.5)     |     |
| Disagree/strongly disagree                                        | 2934<br>(57.19) | 470 (16)   | 2464 (84)   |     | 4929<br>(68.5)  | 2027 (41.1) | 2902<br>(58.9) |     |
| Worried about the likelihood of getting COVID-19                  |                 |            |             | No  |                 |             |                | Yes |
| Strongly agree/agree                                              | 4158<br>(81.05) | 693 (16.7) | 3465 (83.3) |     | 6047<br>(84.1)  | 2105 (34.8) | 3942<br>(65.2) |     |
| Disagree/strongly disagree                                        | 972<br>(18.95)  | 163 (16.8) | 809 (83.2)  |     | 1146<br>(15.9)  | 591 (51.6)  | 555 (48.4)     |     |
| <b>Perceived severity</b>                                         |                 |            |             |     |                 |             |                |     |
| COVID-19 is a serious disease with life-threatening complications |                 |            |             | Yes |                 |             |                | Yes |
| Strongly agree/agree                                              | 4920<br>(95.91) | 800 (16.3) | 4120 (83.7) |     | 6928<br>(96.32) | 2523 (36.4) | 4405<br>(63.6) |     |
| Disagree/strongly disagree                                        | 210<br>(4.09)   | 56 (26.7)  | 154 (73.3)  |     | 265<br>(3.68)   | 173 (65.3)  | 95 (34.7)      |     |
| I will be very sick if I get COVID-19                             |                 |            |             | Yes |                 |             |                | Yes |
| Strongly agree/agree                                              | 3700<br>(72.12) | 667 (18)   | 3033 (82)   |     | 5394<br>(75)    | 1911 (35.4) | 3483<br>(64.6) |     |
| Disagree/strongly disagree                                        | 1430            | 189 (13.2) | 1241 (86.8) |     | 1799            | 785 (43.6)  | 1014           |     |

|                                                                 |                 |            |             |     |                 |             |                |     |
|-----------------------------------------------------------------|-----------------|------------|-------------|-----|-----------------|-------------|----------------|-----|
|                                                                 | (27.88)         |            |             |     | (25)            |             | (56.4)         |     |
| I am afraid of getting COVID-19                                 |                 |            |             | Yes |                 |             |                | Yes |
| Strongly agree/agree                                            | 4757<br>(92.73) | 759 (16)   | 3998 (84)   |     | 6700<br>(93.15) | 2439 (36.4) | 4261<br>(63.6) |     |
| Disagree/strongly disagree                                      | 373<br>(7.27)   | 97 (26)    | 276 (745)   |     | 493<br>(6.85)   | 257 (52.1)  | 236 (47.9)     |     |
| <i>Vaccination Belief Model</i>                                 |                 |            |             |     |                 |             |                |     |
| Vaccination will decrease my chances of getting COVID-19        |                 |            |             | Yes |                 |             |                | Yes |
| Strongly agree/agree                                            | 4481<br>(87.35) | 662 (14.8) | 3819 (85.2) |     | 6339<br>(88.1)  | 2006 (31.6) | 4333<br>(68.4) |     |
| Disagree/strongly disagree                                      | 649<br>(12.65)  | 194 (29.9) | 455 (70.1)  |     | 854<br>(11.9)   | 690 (80.8)  | 164 (19.2)     |     |
| Vaccination will decrease my worries about catching COVID-19    |                 |            |             | Yes |                 |             |                | Yes |
| Strongly agree/agree                                            | 4503<br>(87.78) | 661 (14.7) | 3842 (85.3) |     | 6078<br>(84.5)  | 1833 (30.2) | 4245<br>(69.8) |     |
| Disagree/strongly disagree                                      | 627<br>(12.22)  | 195 (31.1) | 432 (68.9)  |     | 1115<br>(15.5)  | 863 (77.4)  | 252 (22.6)     |     |
| <b>Perceived barriers</b>                                       |                 |            |             |     |                 |             |                |     |
| I worry about the possible side-effects of the COVID-19 vaccine |                 |            |             | Yes |                 |             |                | Yes |
| Strongly agree/agree                                            | 3495<br>(68.13) | 652 (18.7) | 2843 (81.3) |     | 6447<br>(89.6)  | 2647 (41.1) | 3800<br>(58.9) |     |
| Disagree/strongly disagree                                      | 1635<br>(31.87) | 204 (12.5) | 1431 (87.5) |     | 746<br>(10.4)   | 49 (6.6)    | 697 (93.4)     |     |
| I worry about the effectiveness of the COVID-19 vaccine         |                 |            |             | Yes |                 |             |                | Yes |
| Strongly agree/agree                                            | 3505<br>(68.32) | 632 (18)   | 2873 (82)   |     | 6263<br>(87.1)  | 2581 (41.2) | 3682<br>(58.8) |     |
| Disagree/strongly disagree                                      | 1625<br>(31.68) | 224 (13.8) | 1401 (86.2) |     | 930<br>(12.9)   | 115 (12.4)  | 815 (87.6)     |     |
| I worry about the safety of the COVID-19 vaccine                |                 |            |             | Yes |                 |             |                | Yes |
| Strongly agree/agree                                            | 3268<br>(63.7)  | 598 (18.3) | 2670 (81.7) |     | 6389<br>(88.8)  | 2626 (41.1) | 3763<br>(58.9) |     |
| Disagree/strongly disagree                                      | 1862<br>(36.3)  | 258 (13.9) | 1604 (86.1) |     | 804<br>(11.2)   | 70 (8.7)    | 734 (91.3)     |     |
| I worry about the high cost of the COVID-19 vaccine             |                 |            |             | No  |                 |             |                | Yes |
| Strongly agree/agree                                            | 3239<br>(63.14) | 534 (16.5) | 2705 (83.5) |     | 5608<br>(78)    | 2301 (41)   | 3307 (59)      |     |
| Disagree/strongly disagree                                      | 1891<br>(36.86) | 322 (17)   | 1569 (83)   |     | 1585<br>(22)    | 395 (24.9)  | 1190<br>(75.1) |     |
| I worry about fake COVID-19 vaccines                            |                 |            |             | No  |                 |             |                | Yes |
| Strongly agree/agree                                            | 4541<br>(88.52) | 773 (17)   | 3768 (83)   |     | 7006<br>(97.4)  | 2646 (37.8) | 4360<br>(62.2) |     |
| Disagree/strongly disagree                                      | 589<br>(11.48)  | 83 (14.1)  | 506 (85.9)  |     | 187<br>(.03)    | 50 (26.7)   | 197 (73.3)     |     |
| I worry that the COVID-19 vaccines will make me sick            |                 |            |             | Yes |                 |             |                | Yes |
| Strongly agree/agree                                            | 2584            | 542 (21)   | 2042 (79)   |     | 4918            | 2404 (48.9) | 2514           |     |

|                                                                                            |                 |            |             |     |                |             |                |     |
|--------------------------------------------------------------------------------------------|-----------------|------------|-------------|-----|----------------|-------------|----------------|-----|
|                                                                                            | (50.37)         |            |             |     | (68.4)         |             | (51.1)         |     |
| Disagree/strongly disagree                                                                 | 2546<br>(49.63) | 314 (12.3) | 2232 (87.7) |     | 2275<br>(31.6) | 292 (12.8)  | 1983<br>(87.2) |     |
| I worry that the COVID-19 vaccines will not be effective against new variants of the virus |                 |            |             | Yes |                |             |                | Yes |
| Strongly agree/agree                                                                       | 3872<br>(75.48) | 672 (17.4) | 3200 (82.6) |     | 5757<br>(80)   | 2506 (43.5) | 3251<br>(56.5) |     |
| Disagree/strongly disagree                                                                 | 1258<br>(24.52) | 184 (14.6) | 1074 (85.4) |     | 1436<br>(20)   | 190 (13.2)  | 1246<br>(86.8) |     |
